# Supplementary material
Source: publisher site journal article supplement (https://www.dovepress.com/article/383425)
Supplement: Supplementary file 1 [file get_supplementary_file.php]

## Supplementary Materials

**Supplementary data 1.**

Diagnostic support tool for lumbar spinal stenosis (LSS-SSHQ)

|  | Items |
| --- | --- |
| Q1 | Numbness and/or pain in the thighs down to the calves and shins. |
| Q2 | Numbness and/or pain increase in intensity after walking for a while, but are relieved by taking a rest. |
| Q3 | Standing for a while brings on numbness and/or pain in the thighs down to the calves and shins. |
| Q4 | Numbness and/or pain are reduced by bending forward. |
| Q5 | Numbness is present in both legs. |
| Q6 | Numbness is present in the soles of both feet. |
| Q7 | Numbness arises around the buttocks. |
| Q8 | Numbness is present, but pain is absent. |
| Q9 | A burning sensation arises around the buttocks. |
| Q10 | Walking nearly causes urination. |

**Note:** Data fromKonno S, Kikuchi S, Tanaka Y, et al. A diagnostic support tool for lumbar spinal stenosis: a self-administered, self-reported history questionnaire. BMC Musculoskelet Disord. 2007; 8: 102.18

**Supplementary data 2.**

MR machine, image protocol and number of participants

| Manufacturer | Hitachi | Philips |
| --- | --- | --- |
| Product name | AIRIS mate | Gyroscan Intera Power |
| Tesla | 0.2T | 1.0T |
| Slice thickness (mm) | 6 | 5 |
| Slice gap (mm) | 1 | 0.5 |
| TE (ms) | 120 | 120 |
| TR (ms) | 3500 | 4500 |
| No. of participants | 158 | 170 |

Abbreviations: MRI, Magnetic Resonance Imaging; TE, Echo Time; TR, Repetition Time
